# Supplementary material
Source: publisher site journal article supplement (https://www.dovepress.com/get_supplementary_file.php?f=404028.xlsx)
Supplement: Supplementary file 1 [file get_supplementary_file.php]

## Sheet: Sheet1
Supplementary Table 1. Paper-based self-reported questionnaire for lifestyle surveillance
Questions	Possible responses	Notes
Please select your food-eating style from the alternatives given below.	1. I can chew/eat any food.	Participants checking 2 or 3 alternatives were considered to have chewing problems.
	2. I can hardly chew food.
	3. I sometimes have difficulty in chewing food because of problems with my teeth, gums, occlusion or the like.
Do you smoke habitually?	1. Yes, I smoke.	Participants who checked 1 were considered to be smokers.
	2. I have stopped smoking.
	3. No, I don’t smoke.
What is your eating speed as compared to other people?	1. Faster.	Participants who checked 1 were considered to eat fast.
	2. Normal.
	3. Slower.
Do you eat your supper within 2 hours before bedtime three or more times per week?	1. Yes.	Participants who checked 1 were considered to eat dinner late.
	2. No.
Do you consume snacks or sweet beverages in addition to three meals (breakfast, lunch and supper)?	1. Everyday.	Participants who checked 1 were considered to have snack/sweet beverage consumption behavior.
	2. Sometimes.
	3. Seldom.
Do you skip breakfast three or more times per week?	1. Yes.	Participants who checked 1 were considered to skip breakfast.
	2. No.
